# Supplementary material
Source: PubMed Central journal article supplement (PMC2567228)
Supplement: 0802401105_0802401105SI.pdf [file 0802401105_0802401105SI.pdf]

# Supporting Information

Jensen *et al.* 10.1073/pnas.0802401105

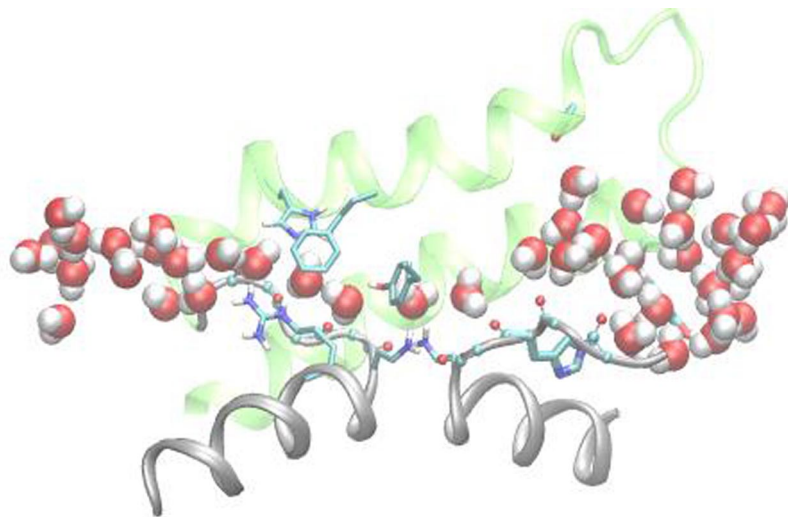

**Movie S1.** Gating and dynamics of water transport across AQP0. The movie represents  $\approx 100$  ns of simulated time, with snapshots separated by 6 ps. It shows water diffusing through a single AQP0 monomer, taken from a simulation of tetrameric, lipid-embedded AQP0<sub>4</sub>. Water is shown in red and white, residues 128–179 of helices IV and V and loop D are in green, and the aquaporin half helices B and E with lumen-exposed carbonyl groups are in gray. The backbone carbonyl group of Val-160, located in helix V, is shown for reference. The remainder of the protein has been omitted for clarity. Side chains of key channel-lining residues are shown in stick representation: Arg-187, His-172, and Phe-48 of the ar/R region near the extracellular end of the channel; the centrally located NPA motifs; the highly conserved tyrosine residues Tyr-23 and Tyr-149; and His-66 near the extracellular end of the channel.

[Movie S1 \(MPG\)](#)

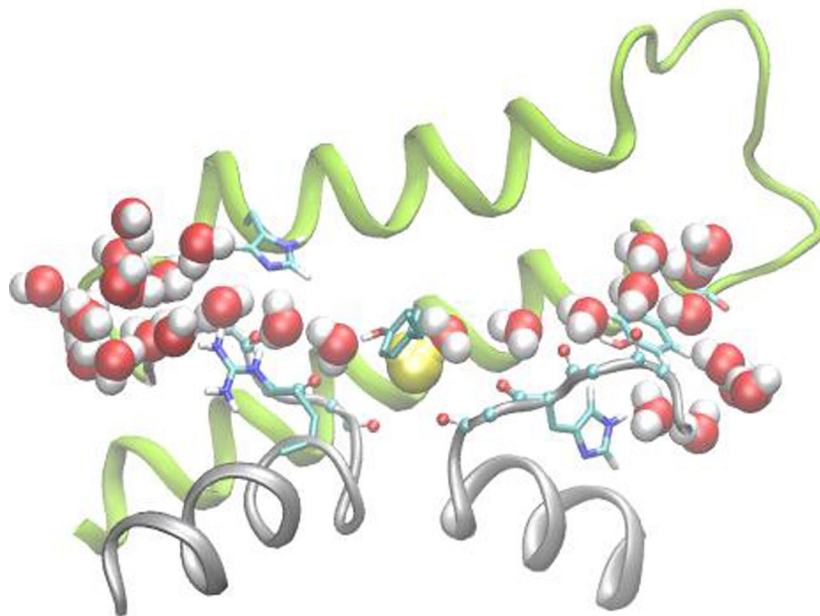

**Movie S2.** Complete permeation event across AQP0. The movie shows  $\approx 30$  ns of simulated time, with snapshots separated by 12 ps. It shows water diffusing through a single AQP0 monomer, taken from a simulation of octameric, lipid-embedded AQP0<sup>8</sup>. A water molecule completely permeating the channel is indicated in yellow. See the [Movie S1](#) legend for more details.

[Movie S2 \(MPG\)](#)

## Other Supporting Information Files

[SI Appendix \(PDF\)](#)
