# Supplementary material
Source: PubMed Central journal article supplement (PMC2567228)
Supplement: 0802401105_Appendix_PDF.pdf [file 0802401105_Appendix_PDF.pdf]

## SI Appendix

**Protein Modeling.** Coordinates for aquaporin monomers in the junctional form (AQP0<sub>J</sub>) and non-junctional form (AQP0<sub>NJ</sub>) were obtained from PDB entries 2B6O and 2B6P/1TM8, respectively (1, 2). VMD (3) was used to add atoms missing from the PDB structures, including hydrogens, the gamma oxygen in the Ser6 residue of AQP0<sub>J</sub>, and the Pro36 residue of AQP0<sub>NJ</sub>. Pro36 was introduced into AQP0<sub>NJ</sub> by aligning residues Ala35 and Gly37 with the corresponding residues in AQP0<sub>J</sub> and modeling the Ala35-Pro36-Gly37 sequence into AQP0<sub>NJ</sub>, retaining the original coordinates of the two flanking residues of the sequence. Tetrameric forms of AQP0<sub>J</sub> and AQP0<sub>NJ</sub> (AQP0<sub>J</sub><sup>4</sup> and AQP0<sub>NJ</sub><sup>4</sup>, respectively) were generated by applying the transformation matrices in the PDB files to protein monomers and all resolved water molecules. All titratable amino acids were modeled assuming standard protonation states at pH = 6.5.

**Membrane Embedding.** Initially AQP0<sub>J</sub><sup>4</sup> was embedded into a pre-equilibrated, fully hydrated 16:0/18:1c9-palmitoyl-oleoyl-phosphoethanolamine (POPE) lipid bilayer. Prerequisite equilibration of the pure bilayer was performed at constant pressure ( $P = 1$  bar) and temperature ( $T = 300$  K) for 60 ns using a system of 340 lipid molecules and 10,305 waters. An equilibrated membrane resulted after approximately 20 ns of simulation with an average area of  $51.8 \pm 0.1 \text{ \AA}^2$ . The pre-equilibrated bilayer was replicated laterally to accommodate AQP0<sub>J</sub><sup>4</sup> and all resolved water molecules, such that the final system included 400 lipid molecules. To ensure overall neutrality, 32 counterions were added using GROMACS (4, 5). A 5 Å wide spacing between lipid and protein was imposed in order to avoid initially unfavorable protein lipid contacts. Initially, the system measured  $151.4 \times 151.6 \times 80.3 \text{ \AA}^3$ . POPE-embedded AQP0<sub>J</sub><sup>4</sup> was minimized using GROMACS (4, 5) with protein atoms fixed and then equilibrated under *NPT* conditions ( $N = 134,683$  atoms,  $P = 1$  bar,  $T = 310$  K). A long equilibration time of ~30 ns was imposed in order to ensure equilibration of the bilayer and appropriate establishment of protein-lipid contacts. This was followed by 170 ns of production *NPT* simulation with  $P = 1$  bar and  $T = 310$  K.

AQP0<sub>NJ</sub><sup>4</sup> was substituted into pre-equilibrated AQP0<sub>J</sub><sup>4</sup>/POPE, replacing protein and experimentally resolved waters of AQP0<sub>J</sub><sup>4</sup> with those of AQP0<sub>NJ</sub><sup>4</sup>. AQP0<sub>NJ</sub><sup>4</sup> was oriented by superimposing protein C<sub>α</sub> atoms of residues 5–235 onto those of AQP0<sub>J</sub><sup>4</sup>. The non-cleaved C-terminus (residues 240 to 263) present in AQP0<sub>NJ</sub><sup>4</sup> protrudes more into the water than the cleaved C-terminus of AQP0<sub>J</sub><sup>4</sup> and we therefore added another 200 water molecules. In order to ensure overall neutrality the number of negative counter charges was adjusted from 32 for AQP0<sub>J</sub><sup>4</sup> to 20 for AQP0<sub>NJ</sub><sup>4</sup>. Lipid-embedded AQP0<sub>NJ</sub><sup>4</sup> ( $N = 136,863$  atoms) underwent an initial equilibration period of 2 ns, followed by 200 ns of production *NPT* simulation with  $P = 1$  bar and  $T = 310$  K.

**Membrane Junction Modeling.** To construct the simulated octameric junction (AQP0<sub>J</sub><sup>8</sup>), AQP0<sub>J</sub><sup>4</sup>, pre-equilibrated in a POPE bilayer was duplicated and one copy was rotated 180° along one of the two in-plane axes of the bilayer. Subsequently, the two copies were fused together. The intermembrane spacing was dictated by superimposing all protein C<sub>α</sub> atoms of the two copies of AQP0<sub>J</sub><sup>4</sup> onto the C<sub>α</sub> atoms of the native junction as specified in PDB entry 2B6O (1). Overlapping water molecules within the intermembrane region were deleted.

Protein and crystal water molecules were fixed during an initial minimization and during subsequent equilibration, involving ~0.4 ns of *NPT* simulation ( $N = 225,089$  atoms,  $P = 1$  bar,

$T = 310$  K). Protein and crystal water molecules were then released and another minimization was performed, followed by 3 ns of simulation in which harmonic potentials restrained the center of mass of each tetramer to the overall center of mass of the octamer such that the two tetramers maintained their mutual contacts. Finally, 110 ns of production *NPT* simulation was performed with  $P = 1$  bar and  $T = 310$  K.

**Permeability Computation.** We computed the osmotic permeability constant ( $p_f$ ) from our equilibrium simulations using the method of Zhu *et al.* (6). Specifically, we defined a collective diffusion coordinate  $n(t)$  capturing the cumulative displacement along the channel axis ( $z$ ) of all water molecules in the lumen of one monomer. We computed  $n(t)$  as the time integral of the instantaneous displacement  $dn(t) = 1/L(t) \sum_i z_i(t) - z_i(t + \delta t)$ , where  $L(t)$  is the instantaneous length of the lumen (taken for each monomer as the region between Arg187: $N_\epsilon$  and Ala65:O; see Fig. 2A and Table 1),  $z_i(t)$  and  $z_i(t + \delta t)$  are the  $z$  coordinates of the  $i^{\text{th}}$  water molecule at two successive time steps, and the sum is over all water molecules found in the lumen at time  $t$ . We then computed  $p_f = v_w D_n$ , where the diffusion coefficient  $D_n$  is derived from  $\langle n^2(t) \rangle = 2D_n t$ , and  $v_w$  is the volume of a single water molecule. This approach has been shown to produce accurate results for other aquaporins (7, 8, 9).

In a pair of interlocked junctional monomers, the flow of water through each lumen is coupled to the flow of water through the intermembrane cavity. Over sufficiently long time periods, this coupling will reduce the diffusion of water through each region, and hence the computed osmotic permeability of each region, resulting in an underestimation of the osmotic permeabilities of the lumens and the cavity. We verified, however, that over the time period of the simulations presented here, the flows through the two lumens exhibited no detectable correlation with one another, such that the effect on our estimates of the luminal permeabilities should be very small. Similarly, the water flow through each lumen exhibited little correlation with water flow through the cavity. Even though the restricting effect of the adjacent lumens biases our estimated value for the cavity permeability toward a lower value than the actual permeability of an unrestricted cavity, this biasing effect should be minor.

The diffusive permeability constant ( $p_d$ ) was calculated as  $p_d = v_w k_o$ , where  $k_o$  is the average rate at which water molecules permeate the lumen of a monomer in one direction.

**Figure S1. Sequence analysis of AQP0**

|             |           | 23    | 149   |                           |
|-------------|-----------|-------|-------|---------------------------|
|             |           |       |       |                           |
| <b>AQP0</b> | Human     | LFYVF | ATYDE | P30301 <i>H. sapiens</i>  |
|             | Sheep     | LFYVF | ATYDE | Q6J8I9 <i>O. aries</i>    |
|             | Cow       | LFYVF | ATYDE | P06624 <i>B. taurus</i>   |
|             | Mouse     | LFYVF | ATYDE | P51180 <i>M. musculus</i> |
|             | Chicken   | LLYTL | ASFDD | P28238 <i>G. gallus</i>   |
|             | Frog      | MFYVF | ATYDE | Q52KZ5 <i>X. laevis</i>   |
|             | Zebrafish | MFYVF | AVTDE | Q6DEI6 <i>D. rerio</i>    |

## Jensen *et al.*, Supporting Information

|             |       |                |                |        |                   |
|-------------|-------|----------------|----------------|--------|-------------------|
| <b>AQP6</b> | Human | GL <b>Y</b> VF | AS <b>T</b> DS | Q13520 | <i>H. sapiens</i> |
| <b>AQP1</b> | Human | TL <b>F</b> VF | AT <b>T</b> DR | P29972 | <i>H. sapiens</i> |
|             |       | ::::           | * *            |        |                   |

The lumen-protruding residues Tyr23 and Tyr149 (bovine AQP0 numbering) are conserved in slow-conducting aquaporins. Tyrosine 23 is conserved in all known mammalian, avian, and amphibian AQP0s, and tyrosine 149 is conserved in most. The anion-selective channel AQP6, which also exhibits anomalously slow water conduction, conserves Tyr23 as well. Tyr23 and Tyr149 are not conserved in fish AQP0 nor in a prototypical fast-conducting aquaporin, AQP1. Swiss-Prot/TrEMBL accession numbers follow each sequence (<http://www.expasy.org>). Note that human, bovine and ovine AQP0 numbering are equivalent; AQP0 from each species has 263 residues and sequence alignment of these AQP0s has no gaps.

**Derivation of Cavity Pressures and the Cavity Pressure Difference.** The AQP0 junction can be approximated as four head-to-head interlocked monomers (see Figure S1) each contributing a junctional channel through which water permeates when crossing the junction. Driven by the pressure difference  $\Delta P \equiv P_1 - P_2 > 0$  where  $P_1$  and  $P_2$  are pressures at the two ends of the junctional channel, each water flow is given by  $J = p_f \Delta P / (RT)$  where  $R$  and  $T$  are the gas constant and temperature.  $p_f$  is the overall osmotic permeability constant of the junctional channel  $1/p_f = 2/p_{f,lum} + 1/p_{f,cav}$  encountered as water flows across three regions; two luminal (*lum*) and one cavity (*cav*) region. This implies a total pressure difference  $\Delta P = (2/p_{f,lum} + 1/p_{f,cav})J$  across the interlocked monomers (and the junction). With the pressure at the two ends of the intermonomeric cavity defined as  $P_{1,cav}$  and  $P_{2,cav}$  where  $P_{1,cav} > P_{2,cav}$ , the pressure difference across the cavity is  $\Delta P_{cav} \equiv P_{1,cav} - P_{2,cav} = 1/p_{f,cav}J$  (see Figure S1). Since steady state water flux is same everywhere in the channel  $J \equiv J_{1,lum} = J_{cav} = J_{2,lum}$  we obtain:

$$RT(J_{1,lum} - J_{cav}) = p_{f,lum}(P_{1,cav} - P_1) - p_{f,cav}(P_{2,cav} - P_{1,cav}) = 0$$

and

$$RT(J_{cav} - J_{2,lum}) = p_{f,cav}(P_{2,cav} - P_{1,cav}) - p_{f,lum}(P_2 - P_{2,cav}) = 0.$$

Solving for  $P_{1,cav}$  and  $P_{2,cav}$  we have:

$$P_{1,cav} = P_1 - (P_1 - P_2) \frac{p_{f,rel}}{2p_{f,rel} + 1} \text{ and } P_{2,cav} = P_2 - (P_2 - P_1) \frac{p_{f,rel}}{2p_{f,rel} + 1}, \text{ with } p_{f,rel} = \frac{p_{f,cav}}{p_{f,lum}}.$$

and for the cavity pressure difference:

$$\Delta P_{cav} = P_{1,cav} - P_{2,cav} = (P_1 - P_2) \left( \frac{1/p_{f,cav}}{2/p_{f,lum} + 1/p_{f,cav}} \right) = \Delta P \left( \frac{1}{2p_{f,rel} + 1} \right).$$

## References

1. Gonen T, Cheng YF, Sliz P, Hiroaki Y, Fujiyoshi Y, Harrison SC, Walz T (2005) Lipid-protein interactions in double-layered two-dimensional AQP0 crystals. *Nature* 438:633-638.
2. Harries WEC, Akhavan D, Miercke LJW, Khademi S, Stroud RM (2004) The channel architecture of aquaporin 0 at a 2.2-Å resolution. *Proc Natl Acad Sci* 101:14045-14050.
3. Humphrey W, Dalke A, Schulten K (1996) VMD: visual molecular dynamics. *J Mol Graph* 14:33-38.
4. Berendsen HJC, van der Spoel D, van Drunen R (1995) GROMACS: A message-passing parallel molecular dynamics implementation. *Comp Phys Comm* 91:43-56.
5. Lindahl E, Hess B, van der Spoel D (2001) GROMACS 3.0: A package for molecular simulation and trajectory analysis. *J Mol Mod* 7:306-317.
6. Zhu FQ, Tajkhorshid E, Schulten K (2004) Collective diffusion model for water permeation through microscopic channels. *Phys Rev Lett* 93:224501.
7. Hashido M, Ikeguchi M, Kidera A (2005) Comparative simulations of aquaporin family: aqp1, AqpZ, Aqp0, and GlpF. *Febs Lett* 579:5549-5552.
8. Jensen MØ, Mouritsen OG (2006) Single-channel water permeabilities of *Escherichia coli* aquaporins AqpZ and GlpF. *Biophys J* 90:2270-2284.
9. Hashido M, Kidera A, Ikeguchi M (2007) Water transport in aquaporins: Osmotic permeability matrix analysis of molecular dynamics simulations. *Biophys J* 93:373-385.
